# Supplementary material for: A multilevel society of herring-eating killer whales indicates adaptation to prey characteristics
Source: Oxford University Press journal article supplement (doi:10.1093/beheco/arw179), 2016-12-01
Supplement: arw179_suppl_supmaterial_s4.docx [file arw179_suppl_supmaterial_s4.docx]

**Supplementary Material S4.** Parameters and QAIC (quasilikelihood Akaike information criterion) values of the models of variation of standardized lagged association rates (*g’(τ)*) with association time lag (*τ*).

**Table S2.** Four exponential models for standardized lagged association rates were fitted: SLAR1 (constant associations), SLAR2 (temporary associations), SLAR3 (combination of constant and temporary associations) and SLAR4 (two different temporary associations with different levels of dissociation). Models fitted using maximum likelihood and binomial loss to the original data. The lowest QAIC value (in bold) indicates the best-fitting model and the *Δ*QAIC (difference between the QAIC of the model and the QAIC of the best-fitting model) indicates the level of suport for other models. Best fitted model reparameterized to give standard error estimates of the typical unit size (*u*) and typical group size (*m*+1, where *m* represents gregariousness).

| **Model** | **Model formula** | **Estimated parameters (jackknifed SE)** | **QAIC** | ***Δ*QAIC** |  |
| --- | --- | --- | --- | --- | --- |
| SLAR1 | *g(τ) = a* | *a* = 0.059534 (0.0038752) | 51657.27 | 54.52 | No support |
| SLAR2 | *g(τ) = a·e(– bτ)* | *a* = 0.061133 (0.0040589)  *b* = 4.4746e-05 (5.7329e-05) | 51653.26 | 50.52 | No support |
| SLAR3 | *g(τ) = a + c·e (– bτ)* | *a* = 0.056241 (0.0041977)  *b* = 0.048547 (0.085382)  *c* = 0.016388 (0.011208) | 51602.74 | 0 | **Best** |
| SLAR4 | *g(τ) = a·e(– bτ ) + c·e(– dτ)* | *a* = 0.023076 (0.009771)  *b* = 0.088789 (0.12038)  *c* = 0.054541 (0.011105)  *d* = -4.2029e-05 (0.000153) | 51603.54 | 0.80 | Some support |
| SLAR3 reparameterized |  | *u* = 11.6593 (3.404)  *m*+1 = 14.7669 (2.4552)  *b* = 0.048598 (0.085363) |  |  |  |
