# Supplementary material for: A multilevel society of herring-eating killer whales indicates adaptation to prey characteristics
Source: Oxford University Press journal article supplement (doi:10.1093/beheco/arw179), 2016-12-01
Supplement: arw179_suppl_supmaterial_s5.docx [file arw179_suppl_supmaterial_s5.docx]

**Supplementary Material S5.** Patterns of association for the most encountered adult females.


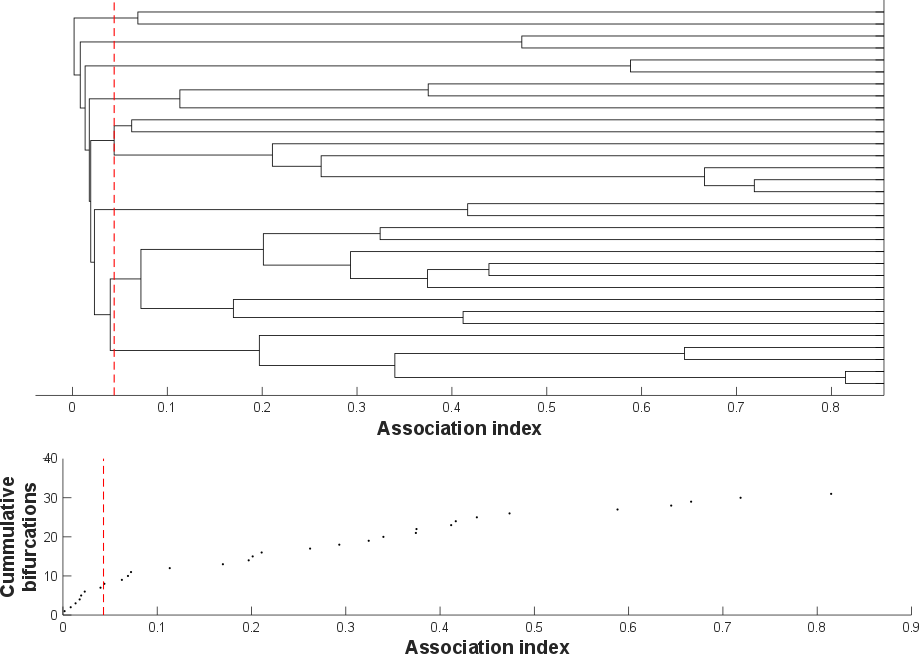


**Figure S11.** Average-linkage cluster dendogram (cophenetic correlation coefficient [CCC] = 0.93) and knot diagram of cumulative bifurcations for the 32 most encountered adult females (on more than 10 days over at least 3 years). A maximum modularity-G, within hierarchical clustering, of 0.48 suggests a division into distinct clusters at an HWI of 0.043 (dashed line).

**
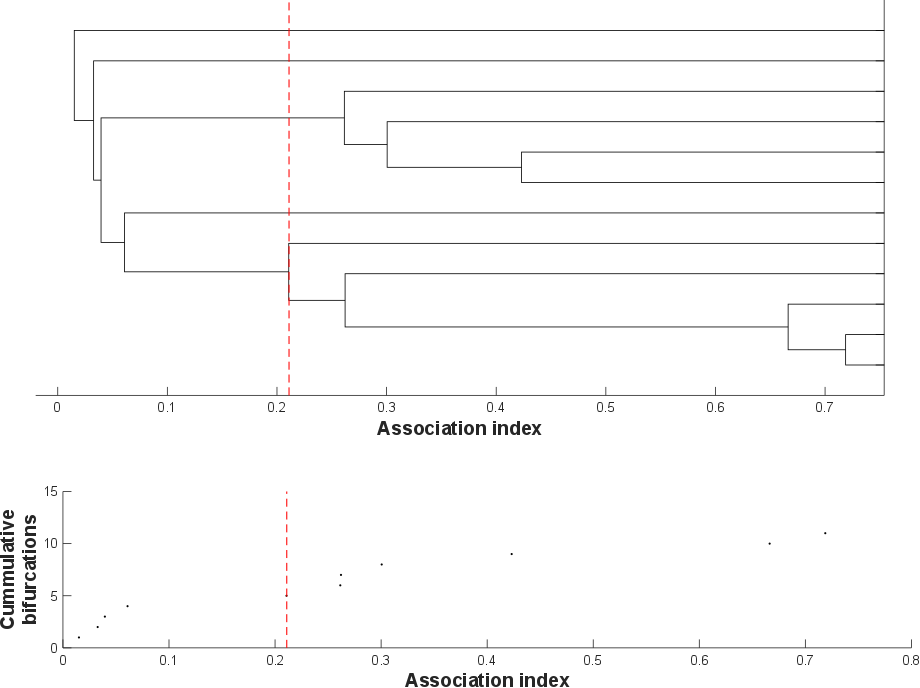
**

**Figure S12.** Average-linkage cluster dendogram (cophenetic correlation coefficient [CCC] = 0.96) and knot diagram of cumulative bifurcations for the 12 most encountered adult females (on at least 20 days over at least 3 different years). A maximum modularity-G, within hierarchical clustering, of 0.39 suggests a division into distinct clusters at an HWI of 0.211 (dashed line).
